# Supplementary material for: Rapid photocatalytic degradation of cationic organic dyes using Li-doped Ni/NiO nanocomposites and their electrochemical performance
Source: Royal Society of Chemistry journal article supplement (doi:10.1039/d0nj05268j), 2020-12-10
Supplement: d0nj05268j1.pdf [file d0nj05268j1.pdf]

**Title:** Rapid Photocatalytic Degradation of Cationic Organic Dyes using Li-doped Ni/NiO nanocomposites and their Electrochemical Performance

**Authors:** Ranjitha R., K.N. Meghana, V.G. Dileep Kumar, Aarti S. Bhatt\*, B.K. Jayanna, C.R. Ravi Kumar, M.S. Santosh\*, H. Madhyastha and K. Sakai

**Journal:** New Journal of Chemistry

### Electronic Supplementary Information

#### Synthesis of Ni/NiO NCs

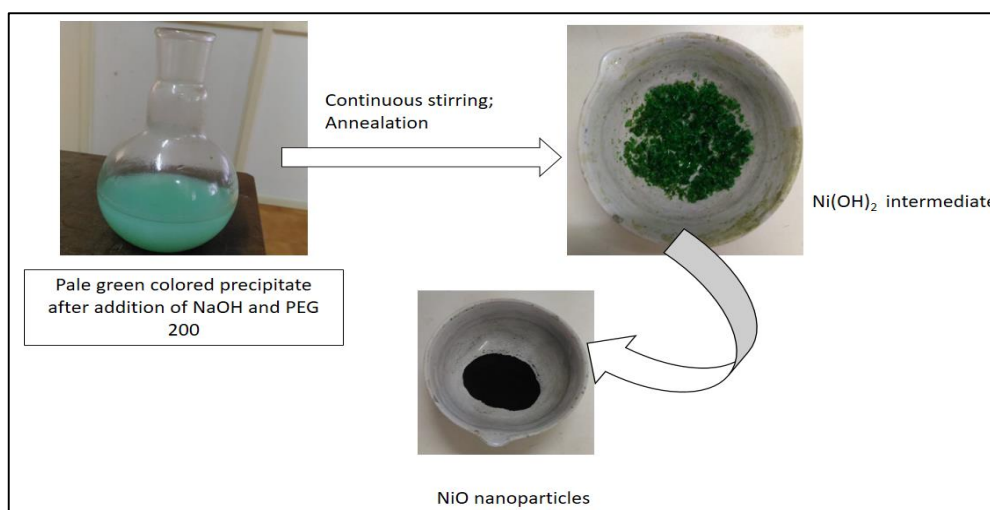

**Fig. S1** Steps involved in the synthesis of Ni/NiO NCs

## Fourier-transform infrared (FT-IR) spectroscopy studies

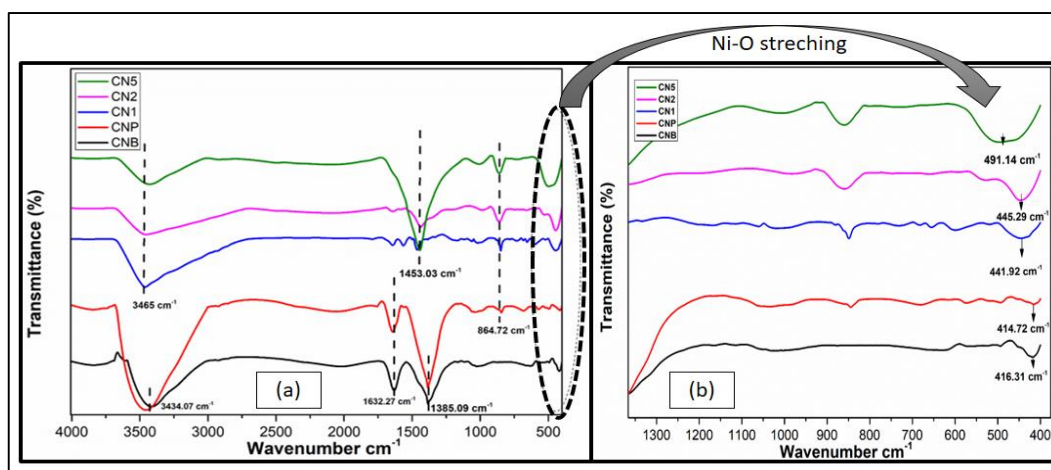

**Fig. S2 (a)** FT-IR spectra of the as prepared NPs **(b)** Expanded view

The absorption bands observed at  $\sim 3450\text{ cm}^{-1}$  is due to the  $\text{-OH}$  stretching mode while bands at  $1632.27$  and  $1385.09\text{ cm}^{-1}$  are caused by O-H bending modes of  $\text{H}_2\text{O}$  molecules absorbed during the synthesis. In the PEG-200 assisted nanoparticles,  $864.72$  and  $1453.03\text{ cm}^{-1}$  can be attributed to  $\text{CH}_2$  bending and C-C stretching vibration frequencies respectively due to the surfactant added.

## BET surface analysis

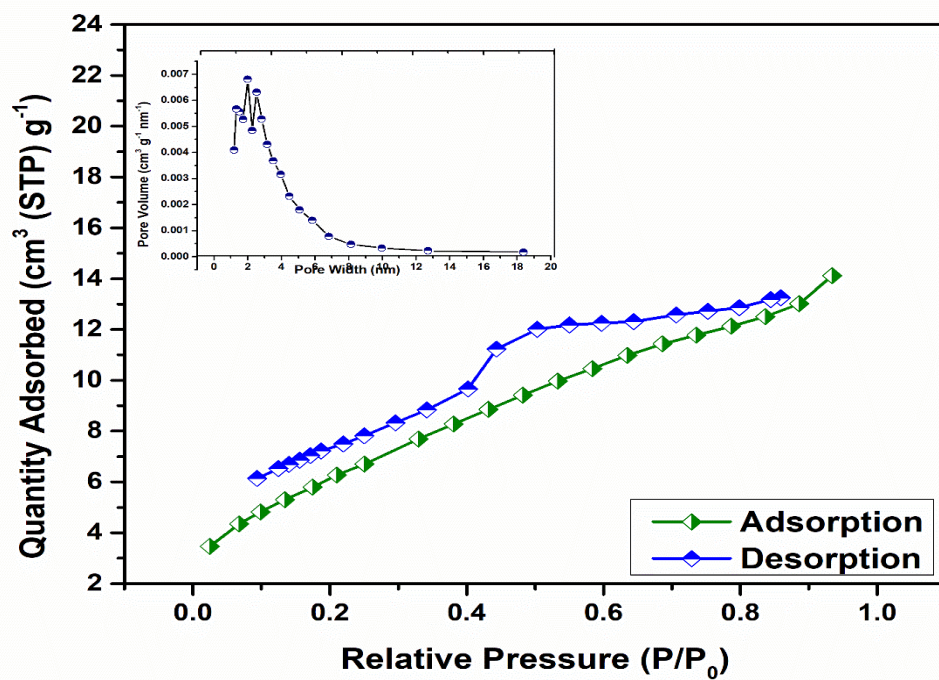

**Fig. S3** N<sub>2</sub> adsorption-desorption isotherms and BJH pore size distribution curve (inset) for CN1 sample.

## Photocatalytic activity

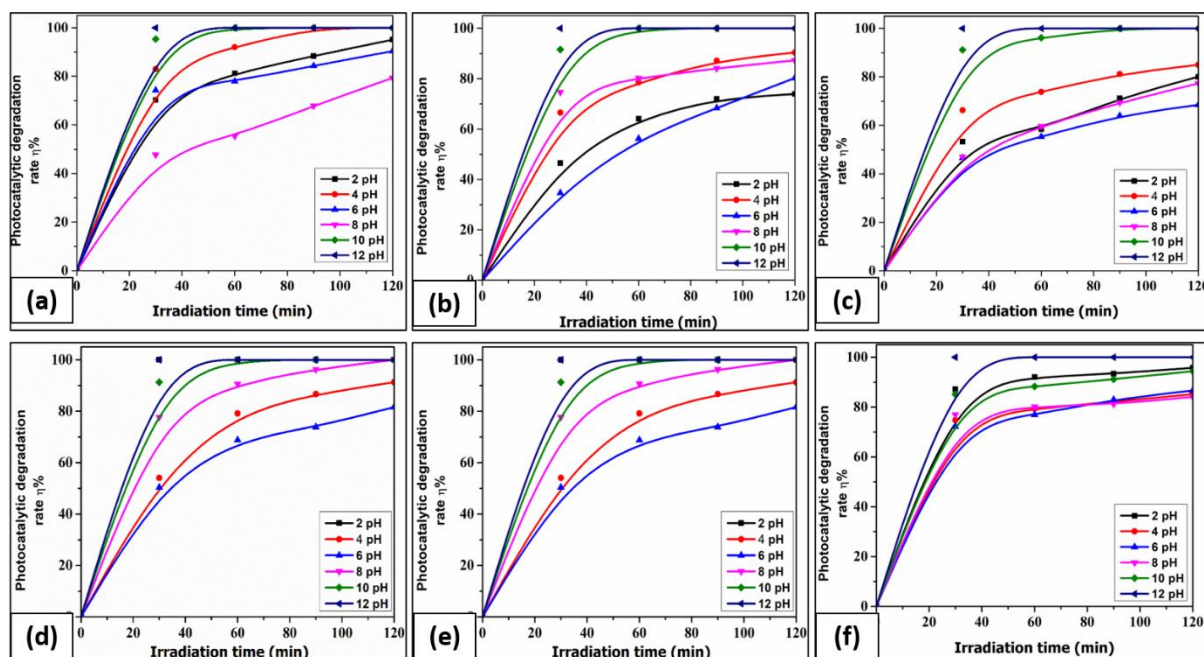

**Fig. S4** Photocatalytic degradation of CV by (a) CN1 (b) CN2 (c) CN5 and MV2B by (d) CN1 (e) CN2 (f) CN5 as a function of pH

**Table S1** First order parameters for CV and MV2B dyes at different catalyst concentration

|                    | CV      |                           |                 | MV2B   |                           |                 |
|--------------------|---------|---------------------------|-----------------|--------|---------------------------|-----------------|
| <b>CN1</b>         |         |                           |                 |        |                           |                 |
| Catalyst load (mg) | $R^2$   | $k$ ( $\text{min}^{-1}$ ) | $t_{1/2}$ (min) | $R^2$  | $k$ ( $\text{min}^{-1}$ ) | $t_{1/2}$ (min) |
| 0.5                | 0.99945 | 0.02674                   | 25.91623        | 0.9489 | 0.01407                   | 49.3248         |
| 1                  | 0.98465 | 0.02613                   | 26.52124        | 0.9841 | 0.00947                   | 73.2840         |
| 2                  | 0.99437 | 0.02206                   | 31.41432        | 0.9092 | 0.00817                   | 84.9449         |
| 3                  | 0.99419 | 0.01936                   | 35.79545        | 0.8694 | 0.00453                   | 153.2009        |
| <b>CN2</b>         |         |                           |                 |        |                           |                 |
| 0.5                | 0.9272  | 0.01730                   | 40.0578         | 0.9867 | 0.00987                   | 70.2128         |
| 1                  | 0.9952  | 0.00717                   | 96.6527         | 0.9753 | 0.00927                   | 74.7573         |
| 2                  | 0.8387  | 0.00807                   | 85.8736         | 0.7708 | 0.00897                   | 77.2575         |
| 3                  | 0.9872  | 0.00487                   | 142.2998        | 0.9418 | 0.00657                   | 105.4795        |
| <b>CN5</b>         |         |                           |                 |        |                           |                 |
| 0.5                | 0.9998  | 0.01593                   | 43.5028         | 0.9904 | 0.01380                   | 50.2174         |
| 1                  | 0.9795  | 0.01200                   | 57.7500         | 0.9027 | 0.01130                   | 61.3274         |
| 2                  | 0.9125  | 0.00900                   | 77.0000         | 0.9705 | 0.00403                   | 171.9603        |
| 3                  | 0.9155  | 0.01020                   | 67.9412         | 0.9392 | 0.00507                   | 136.6864        |

## Electrochemical performance

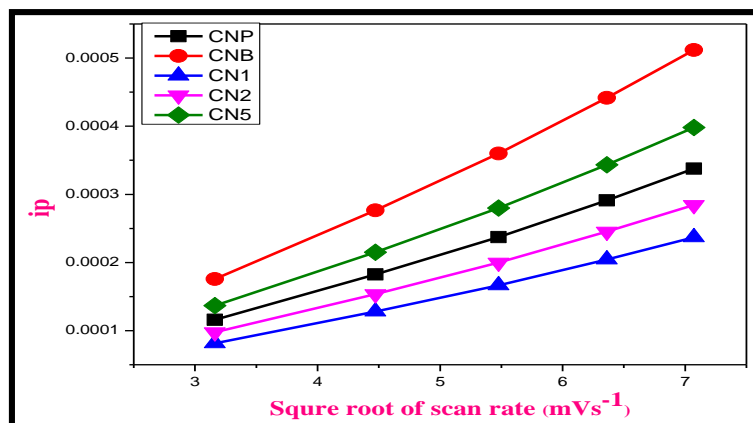

**Fig. S5** Plot showing relationship between cathodic peak current and square root of scan rate

**Table S2** Specific capacitance values for CN1 electrode at different scan rates using CV plot

| Scan rate (mVs <sup>-1</sup> ) | Specific capacitance (Fg <sup>-1</sup> ) |
|--------------------------------|------------------------------------------|
| 10                             | 362.4                                    |
| 20                             | 329.3                                    |
| 30                             | 302.7                                    |
| 40                             | 281.8                                    |
| 50                             | 258.2                                    |

The specific capacitance of CN1 electrode at different scan rates was obtained from the following equation

$$C_{sp} = \frac{S}{m \times \Delta V \times k}$$

where,  $S$  is the area under the CV curve,  $m$  is the weight of active material,  $\Delta V$  is the voltage window and  $k$  is the potential scan rate.

**Table S3** The diffusion co-efficient and EIS fitted circuit values

| Electrode | $D$ (cm <sup>2</sup> s <sup>-1</sup> ) | $R_{ct}$ ( $\Omega$ ) | $C_{dl}$ (mF) |
|-----------|----------------------------------------|-----------------------|---------------|
| CNB       | $1.730 \times 10^{-6}$                 | 182.26                | 0.95          |
| CNP       | $4.022 \times 10^{-5}$                 | 116.6                 | 3.82          |
| CN1       | $8.486 \times 10^{-5}$                 | 69.82                 | 6.531         |
| CN2       | $6.715 \times 10^{-5}$                 | 75.67                 | 4.976         |
| CN5       | $3.591 \times 10^{-6}$                 | 126.34                | 2.36          |
